# Supplementary material for: Integration of molecular features with clinical information for predicting outcomes for neuroblastoma patients
Source: Biol Direct. 2019 Aug 23;14:16. doi: 10.1186/s13062-019-0244-y (PMC6706887; doi:10.1186/s13062-019-0244-y)
Supplement: Supplementary file 2 — The overlapping ratio of the patients with good prognosis between the results from two MRCPS methos in Fig. 3. (XLS 19 kb) [file 13062_2019_244_MOESM2_ESM.xls]

## Sheet: Sheet1
	Group 3 (n=87) from Figure3(d)	Group 5 (n=134) from Figure3(d)
Group 1 (n=128) from Figure 3(c)	81	47
Group 4 (n=126) from Figure 3(c)	5	80
